1 **Impact Of Temperature and Sunshine Duration on Daily New Cases and**  
2 **Death due to COVID-19**

3 Swati Thangariyal<sup>1#</sup>, Aayushi Rastogi<sup>2#</sup>, Arvind Tomar<sup>3</sup>, Ajeet Bhadoria<sup>4</sup>, Sukriti Baweja<sup>1\*</sup>

4 <sup>1</sup>Department of Molecular and Cellular Medicine, Institute of Liver and Biliary Sciences,  
5 New Delhi, India.

6 <sup>2</sup> Department of Epidemiology, Institute of Liver and Biliary Sciences, New Delhi, India.

7 <sup>3</sup>Department of Pulmonary Medicine, Institute of Liver and Biliary Sciences, New Delhi,  
8 India.

9 <sup>4</sup>Department of Community and Family Medicine, All India Institute of Medical Sciences,  
10 Rishikesh. India.

11

12 **\*Corresponding Author:**

13 Dr. Sukriti Baweja, PhD.

14 [sukriti@ilbs.in](mailto:sukriti@ilbs.in), [sukritibiochem@gmail.com](mailto:sukritibiochem@gmail.com)

15

16 **#These authors contributed equally to this work.**

17 **Abbreviations:** Severe acute respiratory syndrome; SARS, severe acute respiratory  
18 syndrome new Coronavirus2; SARS-CoV-2, Global Health Security; GHS, World Health  
19 Organisation;WHO, African region;AFRO, Region of Americas; AMRO, Eastern  
20 Mediterranean Region; EMRO, European Region;EURO, South-East Asia Region; SEARO,  
21 Western Pacific Region; WPRO.

22 **Conflict of interest:** All authors have declared no conflict of interest.

23 **Financial Support:** The author(s) received no specific funding for this work.

24

25 **Author's Contribution:**

26 **Swati Thangriyal:** Data collection, Methodology, Visualisation and Writing

27 Email: [thangriyal.s@gmail.com](mailto:thangriyal.s@gmail.com)

28 **Aayushi Rastogi :** Data curation, Data analysis, Methodology, Statistics, Writing

29 Email: [rastogiaayushi6@gmail.com](mailto:rastogiaayushi6@gmail.com)

30 **Arvind Tomar:** Conceptualisation, Writing - review and editing.

31 Email: [arvindtomar.doc@gmail.com](mailto:arvindtomar.doc@gmail.com)

32 **Sukriti Baweja:** Conceptualisation, Supervision, Methodology, Writing, Review and editing.

33 Email: [sukritibiochem@gmail.com](mailto:sukritibiochem@gmail.com); [sukriti@ilbs.in](mailto:sukriti@ilbs.in)

34

35

36

37

38

39

40

41



43 **Abstract**

44 **Background:** The coronavirus pandemic (COVID-19) control has now become a critical  
45 issue for public health. Many ecological factors are proven to influence the transmission and  
46 survival of the virus. In this study, we aim to determine the association of different climate  
47 factors with the spread and mortality due to COVID-19.

48 **Methods:** The climate indicators included in the study were duration of sunshine, average  
49 minimum temperature and average maximum temperature, with cumulative confirmed cases,  
50 deceased and recovered cases. The data was performed for 138 different countries of the  
51 world, between January 2020 to May 2020. Both univariate and multivariate was performed  
52 for cumulative and month-wise analysis using SPSS software.

53 **Results:** The average maximum temperature, and sunshine duration was significantly  
54 associated with COVID-19 confirmed cases, deceased and recovered. For every one degree  
55 increase in mean average temperature, the confirmed, deceased and recovered cases  
56 decreased by 2047( $p=0.03$ ), 157( $p=0.016$ ), 743 ( $p=0.005$ ) individuals. The association  
57 remained significant even after adjusting for environmental such as sunshine duration as well  
58 as non-environmental variables. Average sunshine duration was inversely correlated with  
59 increase in daily new cases ( $\rho= -2261$ ) and deaths ( $\rho= -0.2985$ ).

60 **Conclusion:** Higher average temperature and longer sunshine duration was strongly  
61 associated with COVID-19 cases and deaths in 138 countries. Hence the temperature is an  
62 important factor in SARS CoV-2 survival and this study will help in formulating better  
63 preventive measures to combat COVID-19 based on their climatic conditions.

64

65

66

## 67 **Introduction**

68 In December 2019, a novel virus with pneumonia-like illness was reported in a cluster of  
69 patients at the Central Hospital of Wuhan, China<sup>1</sup>. The new member of the Coronavirus  
70 family known as ‘SARS-CoV-2 (2019) with unknown etiology increased rapidly resulting in  
71 an outbreak associated with seafood markets in the city of Wuhan<sup>2</sup>. Since then it has spread  
72 almost all over the globe infecting ~ 4.5M people in more than 200 countries and territories<sup>3</sup>.  
73 The rate of infection is very rapid that first it was declared as a public health emergency of  
74 international concern on January 31, 2020, and later its status was upgraded to pandemic.  
75 Climate conditions such as temperature, humidity, wind speed, solar radiation exposure,  
76 population density, and medical care quality are many factors that affect the transmission of  
77 the virus<sup>4</sup>. For the control and prevention of SARS-CoV-2 pandemic, the understanding of  
78 the characteristics of a geographical region with the spreading of COVID-19 is important. We  
79 assume that the climate conditions might also contribute to the infectivity of COVID-19.  
80 The United States of America and the European Region have reported the maximum number  
81 of confirmed cases and deaths related to COVID-19, whereas the African region has reported  
82 the minimum number of confirmed cases and deaths<sup>3</sup>. It is a noticeable fact that the WHO-  
83 South-East Asian region (SEAR) comprises approximately 23% of the world’s population but  
84 accounts for only 2.9% of the COVID-19 cases worldwide, However, second most populated  
85 country such as India is at the seventh position in the WHO list of confirmed cases with  
86 mortality rates between 2.5-2.9%<sup>5</sup>.

87 In the case of the Influenza virus study, the survival and transmission rate shows significant  
88 correlations with absolute humidity<sup>6</sup>. With the increase in the warm weather, a gradual  
89 decrease was seen in the 2003 outbreak of severe acute respiratory syndrome(SARS) cases in  
90 Guangdong and complete resolve at the end of July 2003<sup>7</sup>. Absolute humidity affects the  
91 seasonal outbreak of influenza according to the epidemiological model conducted in the

92 United States<sup>8</sup>. Notably in the current pandemic of COVID-19, the role of environmental  
93 factors play an important role as suggested by data of epidemiology laboratory<sup>9</sup>. Change in  
94 climate conditions governs the Spatio-temporal spread of the virus<sup>10</sup>. Studies from Spain and  
95 Finland show 95% of infection worldwide falls in a dry region with temperature between  
96  $\sim 2^{\circ}\text{C}$  -  $10^{\circ}\text{C}$ <sup>11</sup>. The association between temperature and rate of infection is also seen in the  
97 case of COVID-19. With the mean temperature below  $3^{\circ}\text{C}$ , there is an increase in 4.861 daily  
98 confirmed case<sup>12</sup>. A positive association and negative association is reported by Ma et al. in  
99 March 2020<sup>13</sup> between daily death by COVID-19, diurnal temperature, and relative humidity  
100 respectively but that only from Wuhan, China. In the warmer region, the spreading of  
101 COVID -19 was less in China indicated by showing the correlation between humidity,  
102 temperature, and COVID-19 outbreak<sup>4</sup>. Human movement, age, gender, comorbidities of  
103 individuals and ability to socialise play an important role in transmission of the virus<sup>14</sup>. The  
104 SARS-CoV-2 virus has shown a better stability at low temperature and low  
105 humidity<sup>15</sup>. Another study suggested exposure of SARS-COV to  $56^{\circ}\text{C}$  temperature for 90  
106 minutes can deactivate the virus indicating survival difficulty of the virus at higher  
107 temperatures<sup>16</sup>. However, many other contradictory studies are reporting no association  
108 between the meteorological conditions and spread of COVID-19<sup>17, 18</sup>. There is uncertainty in  
109 the association between the environmental factors and transmission susceptibility of the virus.  
110 Till date, there is no study that has studied the association between the sunshine duration and  
111 temperature from such large cohort of population, as a proof of concept. Hence, our aim of  
112 the present study, was to assess the effect of temperature, sunshine duration on confirmed,  
113 recovered and deceased cases between January 2020 to May 2020. There is an urgent need  
114 for better planning, regulation for preventive measures to combat the COVID-19 pandemic  
115 and our study will pave way for better understanding and may help the government in  
116 formulating better preventive measures based on climatic conditions of the region.

117 **Methods**

118 **Data Collection:** In silico, we collected the data of confirmed, recovered, and death cases of  
119 COVID-19 from an open-source compiled by the Johns Hopkins University Center for  
120 Systems Science and Engineering (JHU CCSE) <https://data.humdata.org/dataset> from 22<sup>nd</sup>  
121 January 2020 till 17<sup>th</sup> May 2020<sup>19</sup> from all the countries, taking into account the range of  
122 countries with maximum - minimum average daily new cases and death in COVID-19. The  
123 data related to the maximum and minimum temperature for all the countries were retrieved  
124 from Accuweather online for the five months from January 2020 to May 2020<sup>20</sup>. However,  
125 it was difficult to gather information on all the locations in a particular country, we restricted  
126 ourselves to the capital cities of each country under consideration. Hence, we collected the  
127 data on maximum and minimum temperature and sunshine duration information only for the  
128 capital city and considered it to be representative of the entire country. The various variables  
129 that can be the potential confounders in the association between temperature and transmission  
130 of COVID-19 like Population, the median age of the country, Global Health Security (GHS)  
131 Rank, were also considered in the analysis. The data related to population and the median  
132 age was downloaded from <https://ourworldindata.org/grapher><sup>21</sup>. GHS score and GHS rank  
133 from Global Health Security Index- 2019 was studied as a proxy for healthcare preparedness  
134 of each country<sup>22</sup>. Since the main aim of our study was to assess the association between  
135 transmission and cause of COVID-19 death and temperature or sunshine duration, we  
136 assumed that countries having more than 300 cases are either having a cluster of cases or  
137 community transmission and hence excluded countries having less than 300 cases. We also  
138 excluded Diamond Princess from the analysis as it was a cruise ship and not a country as a  
139 whole.

140 **Data Analysis:** All the data were analyzed using the SPSS software version 22 software  
141 (IBM SPSS). The Spearman's correlation analysis was used to assess the association

142 between temperature and confirmed, recovered and death cases of COVID-19. Followed by  
143 correlation analysis, we performed univariate and multivariate analyses. We assumed that the  
144 exposure and the outcome variable are following normal distribution and are having a linear  
145 relationship for simplicity. We checked the other assumptions for linear regression and  
146 failing to fulfill them, we used a robust option for further analysis. We prepared various  
147 multivariate models for the analysis to understand the association better. The first model  
148 included another environmental variable: Sun-shine duration. In the second model, we  
149 included other non-environmental variables which potentially can affect the association like  
150 GHS score, the median age of the population, total population per 1,00,000 individuals.

## 151 **Results**

152 The data retrieved from Jan 22, 2020 to May 17, 2020, reported a total of 45, 25, 497  
153 confirmed positive cases of COVID-19 infection spread over 213 countries in the world.  
154 Table 1 represents the global burden of confirmed, recovered, and death due to COVID-19 in  
155 various WHO-Regions till May 17<sup>th</sup>, 2020 <sup>23</sup> showing maximum deaths in Region of  
156 America (AMRO) and minimum deaths in African region(AFRO).

157 Table 1: Global burden of COVID-19 in the WHO-regions.

| WHO-Regions                         | Confirmed cases | Deaths | Recovered Cases |
|-------------------------------------|-----------------|--------|-----------------|
| African Region (AFRO)               | 58663           | 1710   | 23480           |
| Region of the Americas (AMRO)       | 1966932         | 118799 | 512810          |
| Eastern Mediterranean Region (EMRO) | 335088          | 9916   | 165594          |
| European Region (EURO)              | 1870545         | 165951 | 855847          |
| South-East Asia Region (SEARO)      | 135036          | 4411   | 48911           |



|                               |        |      |        |
|-------------------------------|--------|------|--------|
| Western Pacific Region (WPRO) | 167755 | 6737 | 145523 |
|-------------------------------|--------|------|--------|

158

159 However the Figure 1 shows the global cumulative trend in cases of COVID 19 from  
160 January 2020 to May 2020, clearly showing larger exponential growth of number of cases  
161 than recovered cases globally.

## 162 **Figure legend**

163 **Figure 1: Global cumulative increase in number of new cases, death due to SARS-CoV-**  
164 **2 from all the countries affected from January 2020 to May 2020.**

165 Though the Wuhan, China was the origin of the infection, at present, the ten countries -  
166 United States of America (USA), Russian Federation, United Kingdom, Spain, Italy, Brazil,  
167 Germany, Turkey, France, and Iran account for more than 70% of the burden of the  
168 confirmed cases. Moreover, the majority of COVID-19 related deaths are majorly contributed  
169 by the USA, Italy, France, The United Kingdom and Spain whereas the maximum recovery  
170 have been observed in countries like the USA, Germany, Spain, Italy, and Turkey. These  
171 statistics indicate countries that are highly under impact of COVID-19 cases and mortality  
172 are also showing a speedy recovery. Further, these could be an influence due to  
173 environmental factors like temperature and sunshine duration.

## 174 **Correlational Analysis Between Mean Maximum Temperature And Cumulative** 175 **Confirmed Cases, Death And Recovered Cases.**

176 We performed the analysis with 138 countries, having more than 300 confirmed cases of  
177 SARS-COV-2. The overall Spearman's rank correlation analysis between average  
178 temperature (maximum and minimum) for five months and confirmed positive cases, dead  
179 and recovered cases of COVID-19 showed a weak and negative (-0.34) but significant  
180 association, indicating the severity of COVID-19 increases at low temperature. Further, a

181 strong correlation (~0.87) was observed between confirmed, recovered cases, and deaths for  
 182 five months (Table 2). We also performed a similar correlation analysis for the five months  
 183 separately (Supplementary 1). The number of confirmed cases represented a significant  
 184 association with recovered and deceased cases each month separately, however, the  
 185 correlation became stronger with an increased number of confirmed cases, i.e, from January  
 186 2020 to May 2020.

187 Table 2: Results of Spearman’s rank correlation

|                                         | Confirmed cases | Deaths   | Recovered | Avg Max Temp | Avg Min Temp | Avg Sunshine duration |
|-----------------------------------------|-----------------|----------|-----------|--------------|--------------|-----------------------|
| Confirmed cases                         | 1.00            |          |           |              |              |                       |
| Deaths                                  | 0.8731*         | 1.00     |           |              |              |                       |
| Recovered                               | 0.8826*         | 0.7728*  | 1.00      |              |              |                       |
| Avg Max Temp                            | -0.3406*        | -0.3876* | -0.3544*  | 1.00         |              |                       |
| Avg Min Temp                            | -0.3374*        | -0.4129* | -0.3675*  | 0.9432*      | 1.00         |                       |
| Avg Sunshine duration                   | -0.2261*        | -0.2985* | -0.2286*  | 0.6891*      | 0.6510*      | 1.00                  |
| <i>* Indicates significant &lt;0.05</i> |                 |          |           |              |              |                       |

188

189

190

191 **Figure legend**

192 **Figure 2 : Scatter plots for each variable of minimum, maximum average temperature**  
 193 **and duration of sunshine to determine the correlation between total confirmed cases,**  
 194 **total deaths and total recovered cases.**

195 **Univariate analysis between mean maximum temperature and Cumulative confirmed**  
 196 **cases, Death and Recovered cases.**

197 Significant results were obtained on performing univariate analysis with temperature and  
 198 confirmed cases, recovered cases, and death due to COVID-19 separately (Table 3). We also  
 199 performed the same analysis for each month separately. The univariate analysis was not  
 200 found to be significant for the month of January and February, whereas significant  
 201 association ( $<0.05$ ) with months of March and April. However, for the month of May data is  
 202 marginally significant in recovered and death cases but not with confirmed cases  
 203 (Supplementary II). A clear trend was visible, the increase in temperature, there is decline in  
 204 number of cases and deaths (Figure 3)

205 Table 3: Univariate analysis of temperature with a confirmed case, recovered cases and death

| Variables                   | $\beta$ -coefficient (95% CI) | p-value |
|-----------------------------|-------------------------------|---------|
| Maximum average temperature |                               |         |
| Confirmed cases             | -2047.12 (-3897.42 – -196.82) | 0.03    |
| Deaths                      | -157.49 (-284.75 – -30.24)    | 0.016   |
| Recovered cases             | -742.93 (-1261.89 – -223.97)  | 0.005   |
| Minimum average temperature |                               |         |
| Confirmed cases             | -1990.38 (-3837.26 – -143.51) | 0.035   |
| Deaths                      | -148.36 (-272.03 – -24.69)    | 0.019   |
| Recovered cases             | -760.77 (-1279.32 – -242.21)  | 0.004   |

206

207 **Figure legend**

208 **Figure 3: Association between Temperature and COVID-19 cases:** (A) Association  
 209 between temperature and confirmed cases. (B) Association between temperature and  
 210 deceased cases. (C) Association between temperature and recovered cases.

211 **Multivariate regression analysis between mean maximum temperature and Cumulative**  
 212 **confirmed cases, Death and Recovered cases.**

213 Further analysis with another environmental variable like sunshine duration showed a  
 214 significant association between confirmed cases, recovered cases, death, and temperature  
 215 (Table 4a).

216 Table 4a: Adjusted analysis for association of COVID-19 and temperature

| Variables                         | $\beta$ -coefficient<br>(95% CI) | Estimate    | Standard<br>Error | $R^2$  | F -<br>statistics | Model p-<br>value |
|-----------------------------------|----------------------------------|-------------|-------------------|--------|-------------------|-------------------|
| <b>Confirmed COVID-19 cases</b>   |                                  |             |                   |        |                   |                   |
| Maximum<br>average<br>temperature | -2565.40<br>852.43)              | (-5983.24 - | 1728.19           | 0.0240 | 4.03              | 0.019             |
| Sun-shine<br>duration             | 134.9689<br>594.40)              | (-324.46 -  | 232.31            |        |                   |                   |
| <b>Deaths due to COVID-19</b>     |                                  |             |                   |        |                   |                   |
| Maximum<br>average<br>temperature | -158.98<br>56.72)                | (-374.68 -  | 109.07            | 0.0275 | 3.70              | 0.027             |

|                             |                            |        |        |      |       |
|-----------------------------|----------------------------|--------|--------|------|-------|
| Sun-shine duration          | 0.39 (-32.32 33.09)        | 16.53  |        |      |       |
| Recovered COVID-19 cases    |                            |        |        |      |       |
| Maximum average temperature | -776.79 (-1587.60 - 34.02) | 409.97 | 0.0397 | 4.25 | 0.016 |
| Sun-shine duration          | 8.82 (-117.81 - 135.44)    | 64.03  |        |      |       |

217

218 Table 4b suggests the association between temperature and confirmed cases, recovered cases  
 219 and deaths remain significant (<0.05) even after adjusting for non-environmental factors like  
 220 GHS score, GHS rank, the median age of the country, and population per 1,00,000  
 221 individuals. However, more factors can be added to make the model better.

222 Table 4b: Adjusted Analysis for association of COVID-19 and temperature and other  
 223 environmental and non-environmental variables

| Variables                   | $\beta$ -coefficient<br>Estimate (95% CI) | Standard<br>Error | R <sup>2</sup> | F -<br>statistics | p-value |
|-----------------------------|-------------------------------------------|-------------------|----------------|-------------------|---------|
| Confirmed COVID-19 cases    |                                           |                   |                |                   |         |
| Maximum average temperature | -1030.83 (-2709.16 - 647.5)               | 848.39            | 0.1138         | 3.00              | 0.0089  |
| Sun-shine duration          | 228.31 (-371.98 - 828.59)                 | 303.44            |                |                   |         |
| Population per              | 14.92 (-5.99 -35.83)                      | 10.57             |                |                   |         |

|                             |                              |         |        |      |        |
|-----------------------------|------------------------------|---------|--------|------|--------|
| 1,00,000                    |                              |         |        |      |        |
| Median Age of the country   | -918.34 (-3832.84 - 1996.17) | 1473.28 |        |      |        |
| GHS Rank                    | -437.83 (-930.19- 54.53)     | 248.88  |        |      |        |
| GHS Score                   | 729.26 (-1268.52- 2727.03)   | 1009.87 |        |      |        |
| Deaths due to COVID-19      |                              |         |        |      |        |
| Maximum average temperature | -32.29 (-152.18 - 87.59)     | 60.60   | 0.1069 | 2.20 | 0.0465 |
| Sun-shine duration          | 6.80 (-33.49 - 47.05)        | 20.35   |        |      |        |
| Population per 1,00,000     | 0.75 (-0.52 - 2.02)          | 0.64    |        |      |        |
| Median Age of the country   | -61.81 (-261.55 - 137.92)    | 100.97  |        |      |        |
| GHS Rank                    | -37.79 (-71.32 - 4.26)       | 16.95   |        |      |        |
| GHS Score                   | 47.89 (-75.86 - 171.64)      | 62.56   |        |      |        |
| Recovered COVID-19 cases    |                              |         |        |      |        |
| Maximum average             | -378.47 (-915.52 - 158.57)   | 271.47  | 0.1957 | 3.60 | 0.0024 |

|                           |                           |        |  |  |  |
|---------------------------|---------------------------|--------|--|--|--|
| temperature               |                           |        |  |  |  |
| Sun-shine duration        | 34.37 (-102.18 - 170.92)  | 69.03  |  |  |  |
| Population per 1,00,000   | 6.56 (1.53 - 11.59)       | 2.54   |  |  |  |
| Median Age of the country | 283.81 (-414.69 - 982.32) | 353.09 |  |  |  |
| GHS Rank                  | -111.75 (-222.57 - 0.93)  | 56.02  |  |  |  |
| GHS Score                 | 109.16 (-283.86 - 502.18) | 198.67 |  |  |  |

224

## 225 Discussion

226 The spread and transmission of COVID-19 pandemic is a global emergency issue that is  
 227 challenging for everyone. Our finding suggests the significant association between the  
 228 temperature and sunshine duration with daily new cases and deaths of COVID-19. We  
 229 analysed the data from January 22, 2020, to May 17, 2020, from 138 countries. Wuhan  
 230 Province in China being the epicenter of the outbreak, occupies eighth place whereas  
 231 American and European countries are at the top of the list. Most of the Asian countries are not  
 232 available on the list of WHO highly affected countries by novel coronavirus. This unexpected  
 233 distribution of data can be due to many reasons such as the genetics of the host, the  
 234 immunization against different viral strains, mode of transmission of the virus, and climate  
 235 conditions<sup>24</sup>.

236 This is a unique study which is addressing the association of temperature and sunshine  
237 duration with COVID-19 transmission after adjusting for non-environmental factors. The  
238 study also performed the cumulative as well as month-wise analysis.

239 In the correlation analysis confirmed cases, death, and recovered cases were found to be  
240 significantly correlated with average minimum, maximum temperature and sunshine duration  
241 ( $<0.05$ ). Our study suggested a weak and negative correlation of temperature with the  
242 cumulative confirmed cases, cumulative deaths, and cumulative recoveries. Moreover, ever,  
243 the average sunshine duration was also found to be significantly correlated with cumulative  
244 confirmed cases, cumulative deaths, and cumulative recoveries. Our results were found to be  
245 not coinciding with a similar study<sup>25</sup> as the Yales study has taken data until the months of  
246 March whereas the present study has taken data till May 2020.

247 The univariate analysis suggested that the cumulative confirmed cases, recovered cases, and  
248 deaths due to COVID -19 were found to be significantly associated with mean maximum  
249 temperature and mean minimum temperature ( $<0.05$ ). For every one-degree increase in mean  
250 average temperature, the confirmed cases, deaths, recovered cases decreased by 2047, 157,  
251 743 individuals respectively. Though the results seems to be obvious, the decline in  
252 recovered cases can be attributable to the other factors such as an increasing burden on the  
253 health care system which we have not to addressed in our study.

254 After adjusting for environmental factors like sunshine duration, the association was found to  
255 be significant between mean maximum temp and cumulative confirmed cases, death, and  
256 recovered cases. However, the model had a weak  $R^2$  ranging from 2.40% to 3.97%. The  
257 association was still found to be significant with a p-value  $<0.05$ . After adjusting for non-  
258 environmental factors like GHS score, median age of the population, total population per  
259 1,00,000 individuals, the  $R^2$  also improved and now ranges from 11.38% to 19.57%. A  
260 reduction of 1031 confirmed cases, 32 deaths, and 378 recovered cases were observed after



261 adjusting for environmental and non-environmental factors. The decline in recovered cases  
262 can be attributable to other factors such as an increasing burden on the health care system.

263 Though our study is a unique study but there are several limitations in our study. The lacune  
264 of this study is that we assumed normal distribution of the outcome variable and linear  
265 relationship between exposure and outcome variable. However, the study was not able to  
266 address some kind of non-linearity in the analysis. Moreover, the data collected for the  
267 temperature and sunshine duration was only retrieved for the capital city and was assumed to  
268 be representative of the entire country and in reality it may not be the actual scenario. Since  
269 this study was retrospective, data for various variables was not available eg. humidity,  
270 airspeed, and most importantly the lockdown of human movement which is adopted by many  
271 countries. The total number of cases across the globe is difficult to predict due to the  
272 uncertainty of data collected by different countries. Hence, further evaluations are needed for  
273 a better understanding of the role of environmental and non environmental factors influencing  
274 the transmission of this pandemic. In conclusion, our study showed a possible association  
275 between environmental conditions and COVID-19 infection.

276

277

278

279

## 280 **References**

- 281 1. Wu, F. *et al.* A new coronavirus associated with human respiratory disease in China.  
282 *Nature* **579**, 265–269 (2020).
- 283 2. WHO | Novel Coronavirus – China. *WHO* [http://www.who.int/csr/don/12-january-2020-](http://www.who.int/csr/don/12-january-2020-novel-coronavirus-china/en/)  
284 [novel-coronavirus-china/en/](http://www.who.int/csr/don/12-january-2020-novel-coronavirus-china/en/).

- 285 3. 20200518-covid-19-sitrep-119.pdf.
- 286 4. Wang, W. *et al.* Detection of SARS-CoV-2 in Different Types of Clinical Specimens.  
287 *JAMA* **323**, 1843–1844 (2020).
- 288 5. 20200604-covid-19-sitrep-136.pdf.
- 289 6. Metz, J. A. & Finn, A. Influenza and humidity--Why a bit more damp may be good for  
290 you! *J. Infect.* **71 Suppl 1**, S54-58 (2015).
- 291 7. Wallis, P. & Nerlich, B. Disease metaphors in new epidemics: the UK media framing of  
292 the 2003 SARS epidemic. *Soc Sci Med* **60**, 2629–2639 (2005).
- 293 8. Shaman, J., Pitzer, V. E., Viboud, C., Grenfell, B. T. & Lipsitch, M. Absolute Humidity  
294 and the Seasonal Onset of Influenza in the Continental United States. *PLOS Biology* **8**,  
295 e1000316 (2010).
- 296 9. Do weather conditions influence the transmission of the coronavirus (SARS-CoV-2)?  
297 *CEBM* [https://www.cebm.net/covid-19/do-weather-conditions-influence-the-transmission-](https://www.cebm.net/covid-19/do-weather-conditions-influence-the-transmission-of-the-coronavirus-sars-cov-2/)  
298 [of-the-coronavirus-sars-cov-2/](https://www.cebm.net/covid-19/do-weather-conditions-influence-the-transmission-of-the-coronavirus-sars-cov-2/).
- 299 10. Dalziel, B. D. *et al.* Urbanization and humidity shape the intensity of influenza  
300 epidemics in U.S. cities. *Science* **362**, 75–79 (2018).
- 301 11. Araujo, M. B. & Naimi, B. Spread of SARS-CoV-2 Coronavirus likely to be  
302 constrained by climate. *medRxiv* 2020.03.12.20034728 (2020)  
303 doi:10.1101/2020.03.12.20034728.
- 304 12. Xie, J. & Zhu, Y. Association between ambient temperature and COVID-19 infection  
305 in 122 cities from China. *Science of The Total Environment* **724**, 138201 (2020).
- 306 13. Ma, Y. *et al.* Effects of temperature variation and humidity on the death of COVID-19  
307 in Wuhan, China. *Science of The Total Environment* **724**, 138226 (2020).
- 308 14. Ujiie, M., Tsuzuki, S. & Ohmagari, N. Effect of temperature on the infectivity of  
309 COVID-19. *Int. J. Infect. Dis.* **95**, 301–303 (2020).

- 310 15. Chan, K. H. *et al.* The Effects of Temperature and Relative Humidity on the Viability  
311 of the SARS Coronavirus. *Advances in Virology* vol. 2011 e734690  
312 <https://www.hindawi.com/journals/av/2011/734690/> (2011).
- 313 16. Duan, S.-M. *et al.* Stability of SARS coronavirus in human specimens and  
314 environment and its sensitivity to heating and UV irradiation. *Biomed. Environ. Sci.* **16**,  
315 246–255 (2003).
- 316 17. Shi, P. *et al.* The impact of temperature and absolute humidity on the coronavirus  
317 disease 2019 (COVID-19) outbreak - evidence from China. *medRxiv* 2020.03.22.20038919  
318 (2020) doi:10.1101/2020.03.22.20038919.
- 319 18. Jamil, T., Alam, I. S., Gojobori, T. & Duarte, C. No Evidence for Temperature-  
320 Dependence of the COVID-19 Epidemic. *medRxiv* 2020.03.29.20046706 (2020)  
321 doi:10.1101/2020.03.29.20046706.
- 322 19. Novel Coronavirus (COVID-19) Cases Data - Humanitarian Data Exchange.  
323 <https://data.humdata.org/dataset/5dff64bc-a671-48da-aa87-2ca40d7abf02>.
- 324 20. Local, National, & Global Daily Weather Forecast | AccuWeather.  
325 <https://www.accuweather.com/>.
- 326 21. Case fatality rate of COVID-19 vs. Median Age. *Our World in Data*  
327 <https://ourworldindata.org/grapher/case-fatality-rate-of-covid-19-vs-median-age>.
- 328 22. The Global Health Security Index. *GHS Index* <https://www.ghsindex.org/>.
- 329 23. 20200517-covid-19-sitrep-118.pdf.
- 330 24. Abdullahi, I. N. *et al.* Exploring the genetics, ecology of SARS-COV-2 and climatic  
331 factors as possible control strategies against COVID-19. *Infez Med* **28**, 166–173 (2020).
- 332 25. Pawar, S., Stanam, A., Chaudhari, M. & Rayudu, D. Effects of temperature on  
333 COVID-19 transmission. *medRxiv* 2020.03.29.20044461 (2020)  
334 doi:10.1101/2020.03.29.20044461.



336 **Supporting Information**

337

338 **Supplementary I**

339 **Table 1: Results of Spearman’s rank correlation for the month of January, 2020**

|                                         | Confirmed cases | Deaths  | Recovered | Avg Max Temp | Avg Min Temp | Avg Sunshine duration |
|-----------------------------------------|-----------------|---------|-----------|--------------|--------------|-----------------------|
| Confirmed cases                         | 1.00            |         |           |              |              |                       |
| Deaths                                  | 0.2306*         | 1.00    |           |              |              |                       |
| Recovered                               | 0.4527*         | 0.5055* | 1.00      |              |              |                       |
| Avg Max Temp                            | -0.0426         | -0.0676 | 0.0740    | 1.00         |              |                       |
| Avg Min Temp                            | -0.0282         | -0.0740 | 0.0254    | 0.9252*      | 1.00         |                       |
| Avg Sunshine duration                   | -0.1074         | -0.0568 | 0.1032    | 0.7809*      | 0.7054*      | 1.00                  |
| <i>* Indicates significant &lt;0.05</i> |                 |         |           |              |              |                       |

340

341 **Table 2: Results of Spearman’s rank correlation for the month of February, 2020**

|                 | Confirmed cases | Deaths  | Recovered | Avg Max Temp | Avg Min Temp | Avg Sunshine duration |
|-----------------|-----------------|---------|-----------|--------------|--------------|-----------------------|
| Confirmed cases | 1.00            |         |           |              |              |                       |
| Deaths          | 0.4075*         | 1.00    |           |              |              |                       |
| Recovered       | 0.6437*         | 0.5293* | 1.00      |              |              |                       |

|                                         |          |         |         |         |         |      |
|-----------------------------------------|----------|---------|---------|---------|---------|------|
| Avg Max Temp                            | -0.2939* | -0.1050 | -0.1101 | 1.00    |         |      |
| Avg Min Temp                            | -0.2586* | -0.0996 | -0.0585 | 0.9264* | 1.00    |      |
| Avg Sunshine duration                   | -0.2397* | -0.0985 | -0.0915 | 0.7822* | 0.7153* | 1.00 |
| <i>* Indicates significant &lt;0.05</i> |          |         |         |         |         |      |

342

343 Table 3: Results of Spearman’s rank correlation for the month of March, 2020

|                                         | Confirmed cases | Deaths   | Recovered | Avg Max Temp | Avg Min Temp | Avg Sunshine duration |
|-----------------------------------------|-----------------|----------|-----------|--------------|--------------|-----------------------|
| Confirmed cases                         | 1.00            |          |           |              |              |                       |
| Deaths                                  | 0.8551*         | 1.00     |           |              |              |                       |
| Recovered                               | 0.8184*         | 0.6955*  | 1.00      |              |              |                       |
| Avg Max Temp                            | -0.5234*        | -0.3818* | -0.3306*  | 1.00         |              |                       |
| Avg Min Temp                            | -0.5219*        | -0.4010* | -0.3304*  | 0.9482*      | 1.00         |                       |
| Avg Sunshine duration                   | -0.3854*        | -0.3085* | -0.2207   | 0.6983*      | 0.6636*      | 1.00                  |
| <i>* Indicates significant &lt;0.05</i> |                 |          |           |              |              |                       |

344

345 Table 4: Results of Spearman’s rank correlation for the month of April, 2020

|  | Confirmed cases | Deaths | Recovered | Avg Max Temp | Avg Min Temp | Avg Sunshine duration |
|--|-----------------|--------|-----------|--------------|--------------|-----------------------|
|--|-----------------|--------|-----------|--------------|--------------|-----------------------|

|                                         |          |          |          |         |         |      |
|-----------------------------------------|----------|----------|----------|---------|---------|------|
| Confirmed cases                         | 1.00     |          |          |         |         |      |
| Deaths                                  | 0.8760*  | 1.00     |          |         |         |      |
| Recovered                               | 0.8347*  | 0.7696*  | 1.00     |         |         |      |
| Avg Max Temp                            | -0.3133* | -0.3992* | -0.3459* | 1.00    |         |      |
| Avg Min Temp                            | -0.3662* | -0.4737* | -0.4095* | 0.9212* | 1.00    |      |
| Avg Sunshine duration                   | -0.1506  | -0.2431* | -0.1717* | 0.5192* | 0.5136* | 1.00 |
| <i>* Indicates significant &lt;0.05</i> |          |          |          |         |         |      |

346

347 Table 5: Results of Spearman's rank correlation for the month of May#, 2020

|                                         | Confirmed cases | Deaths   | Recovered | Avg Max Temp | Avg Min Temp | Avg Sunshine duration |
|-----------------------------------------|-----------------|----------|-----------|--------------|--------------|-----------------------|
| Confirmed cases                         | 1.00            |          |           |              |              |                       |
| Deaths                                  | 0.8301*         | 1.00     |           |              |              |                       |
| Recovered                               | 0.7515*         | 0.7041*  | 1.00      |              |              |                       |
| Avg Max Temp                            | -0.0170         | -0.2470* | -0.1841*  | 1.00         |              |                       |
| Avg Min Temp                            | -0.0723         | -0.3016* | -0.2437*  | 0.9306*      | 1.00         |                       |
| Avg Sunshine duration                   | 0.0409          | -0.0364  | 0.0038    | 0.1771*      | 0.1092       | 1.00                  |
| <i>* Indicates significant &lt;0.05</i> |                 |          |           |              |              |                       |

348 # Considered the data till 17<sup>th</sup> May 2020

349

350 Supplementary II

351 Table 1: Univariate analysis of temperature with a confirmed case, recovered cases and death

352 for the month of January 2020

| Variables                   | $\beta$ coefficient (95% CI) | p-value |
|-----------------------------|------------------------------|---------|
| Maximum average temperature |                              |         |
| Confirmed cases             | -5.72 (-17.09 – 5.65)        | 0.322   |
| Deaths                      | -0.13 (-0.37 – 0.12)         | 0.321   |
| Recovered cases             | -0.12 (-0.37 – 0.13)         | 0.342   |
| Minimum average temperature |                              |         |
| Confirmed cases             | -6.07 (-18.16 – 6.01)        | 0.322   |
| Deaths                      | - 0.13 (-0.39 – 0.13)        | 0.321   |
| Recovered cases             | -0.13 (-0.39 – 0.14)         | 0.340   |

353

354 Table 2: Univariate analysis of temperature with confirmed case, recovered cases and death

355 for the month of February, 2020

| Variables                   | $\beta$ -coefficient (95% CI) | p-value |
|-----------------------------|-------------------------------|---------|
| Maximum average temperature |                               |         |
| Confirmed cases             | -32.63 (-91.29 – 26.02)       | 0.273   |
| Deaths                      | -1.15 (-3.35 – 1.05)          | 0.305   |
| Recovered cases             | -16.40 (-49.19 – 16.39)       | 0.325   |
| Minimum average temperature |                               |         |
| Confirmed cases             | -45.15 (-127.52 – 37.21)      | 0.280   |
| Deaths                      | -1.61 (-4.71 – 1.48)          | 0.306   |



|                 |                         |       |
|-----------------|-------------------------|-------|
| Recovered cases | -23.22 (-69.37 – 22.94) | 0.322 |
|-----------------|-------------------------|-------|

356

357 Table 3: Univariate analysis of temperature with confirmed case, recovered cases and death  
 358 for the month of March, 2020

| Variables                   | $\beta$ coefficient (95% CI) | p-value |
|-----------------------------|------------------------------|---------|
| Maximum average temperature |                              |         |
| Confirmed cases             | -341.32 (-556.12 – -126.53)  | 0.002   |
| Deaths                      | -16.92676 (-31.44 – -2.42)   | 0.023   |
| Recovered cases             | -65.29 (-113.24 – -17.34)    | 0.008   |
| Minimum average temperature |                              |         |
| Confirmed cases             | -338.60 ( -549.43 – -127.77) | 0.002   |
| Deaths                      | -15.79 (-29.45 – -2.13)      | 0.024   |
| Recovered cases             | -65.69 (-113.26 – -18.13)    | 0.007   |

359

360 Table 4: Univariate analysis of temperature with confirmed case, recovered cases and death  
 361 for the month of April, 2020

| Variables                   | $\beta$ -coefficient (95% CI)  | p-value |
|-----------------------------|--------------------------------|---------|
| Maximum average temperature |                                |         |
| Confirmed cases             | -1327.32 (-2573.13 – -81.50)   | 0.037   |
| Deaths                      | -108.28 (-195.88 – -20.69)     | 0.016   |
| Recovered cases             | -444.88 (-763.20 – -126.57)    | 0.007   |
| Minimum average temperature |                                |         |
| Confirmed cases             | -1176.16 (-2220.22 – -132.09 ) | 0.028   |

|                 |                             |       |
|-----------------|-----------------------------|-------|
| Deaths          | -96.91 (-170.74 – -23.08)   | 0.010 |
| Recovered cases | -418.07 (-697.82 – -138.32) | 0.004 |

362

363 Table 5: Univariate analysis of temperature with confirmed case, recovered cases and death

364 for the month of May#, 2020

| Variables                   | $\beta$ coefficient (95% CI) | p-value |
|-----------------------------|------------------------------|---------|
| Maximum average temperature |                              |         |
| Confirmed cases             | -499.97 (-1225.56 – 225.62)  | 0.175   |
| Deaths                      | -51 (-103.28 – 1.27)         | 0.056   |
| Recovered cases             | -199.03 (-444.92 – 46.86)    | 0.112   |
| Minimum average temperature |                              |         |
| Confirmed cases             | -491.52 (-1107.38 – 124.34)  | 0.117   |
| Deaths                      | -46.35 (-91.74 – -0.96)      | 0.045   |
| Recovered cases             | -244.63 (-469.98 – -19.27)   | 0.034   |

365 # Considered the data till 17<sup>th</sup> May 2020

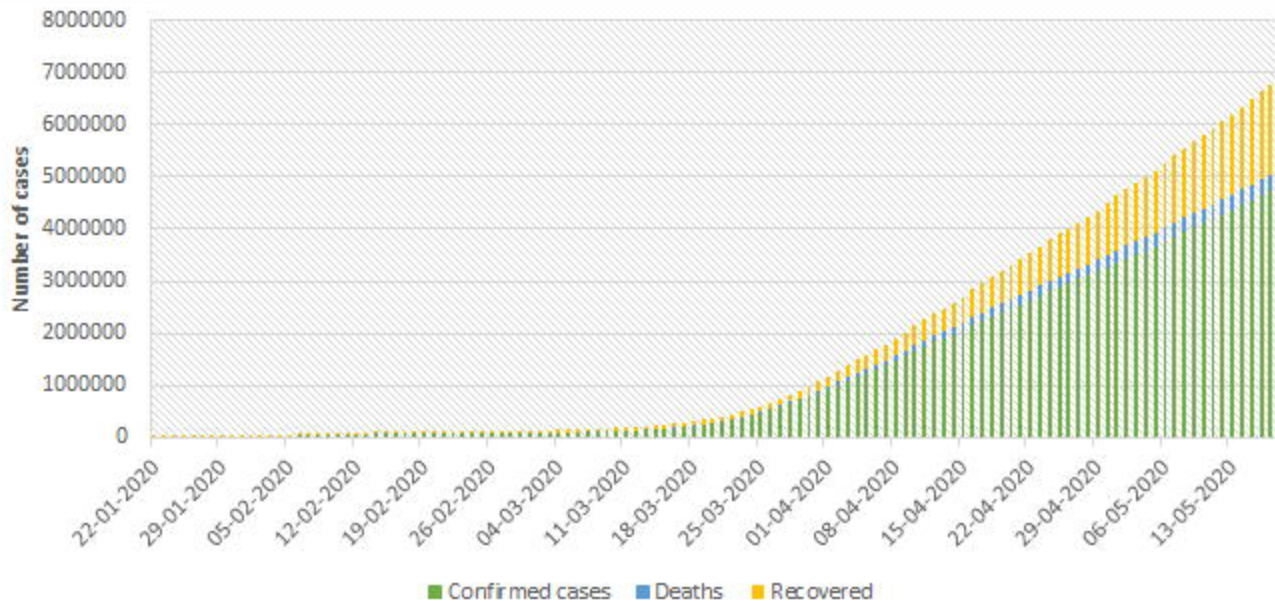

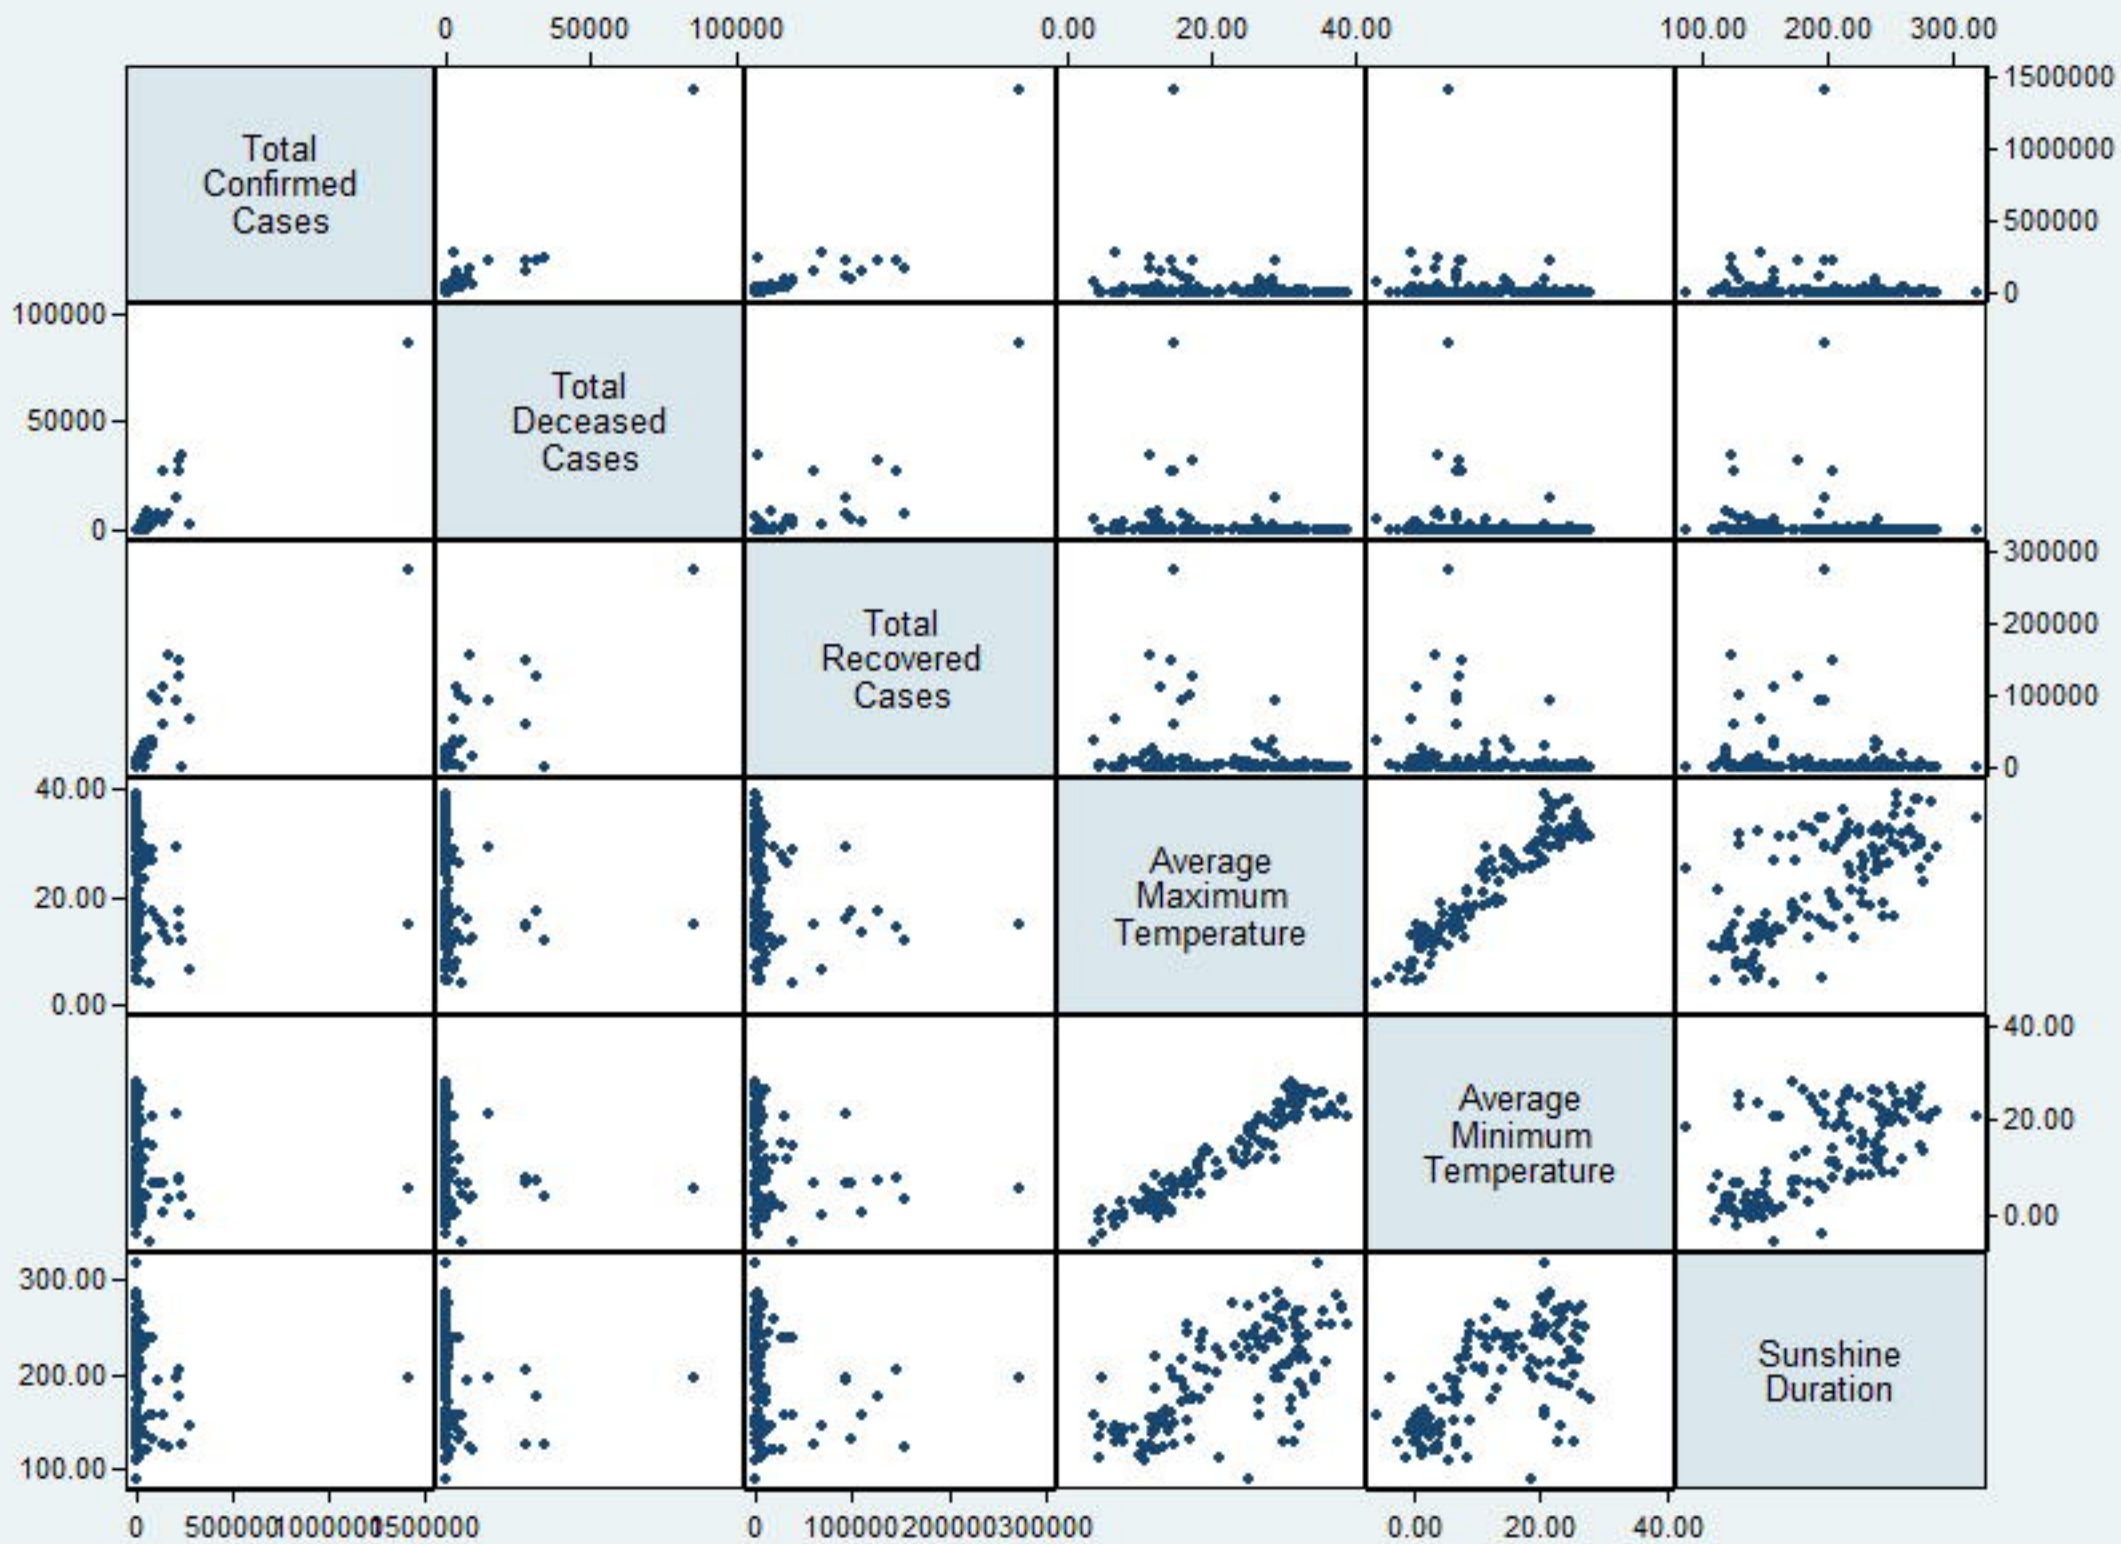

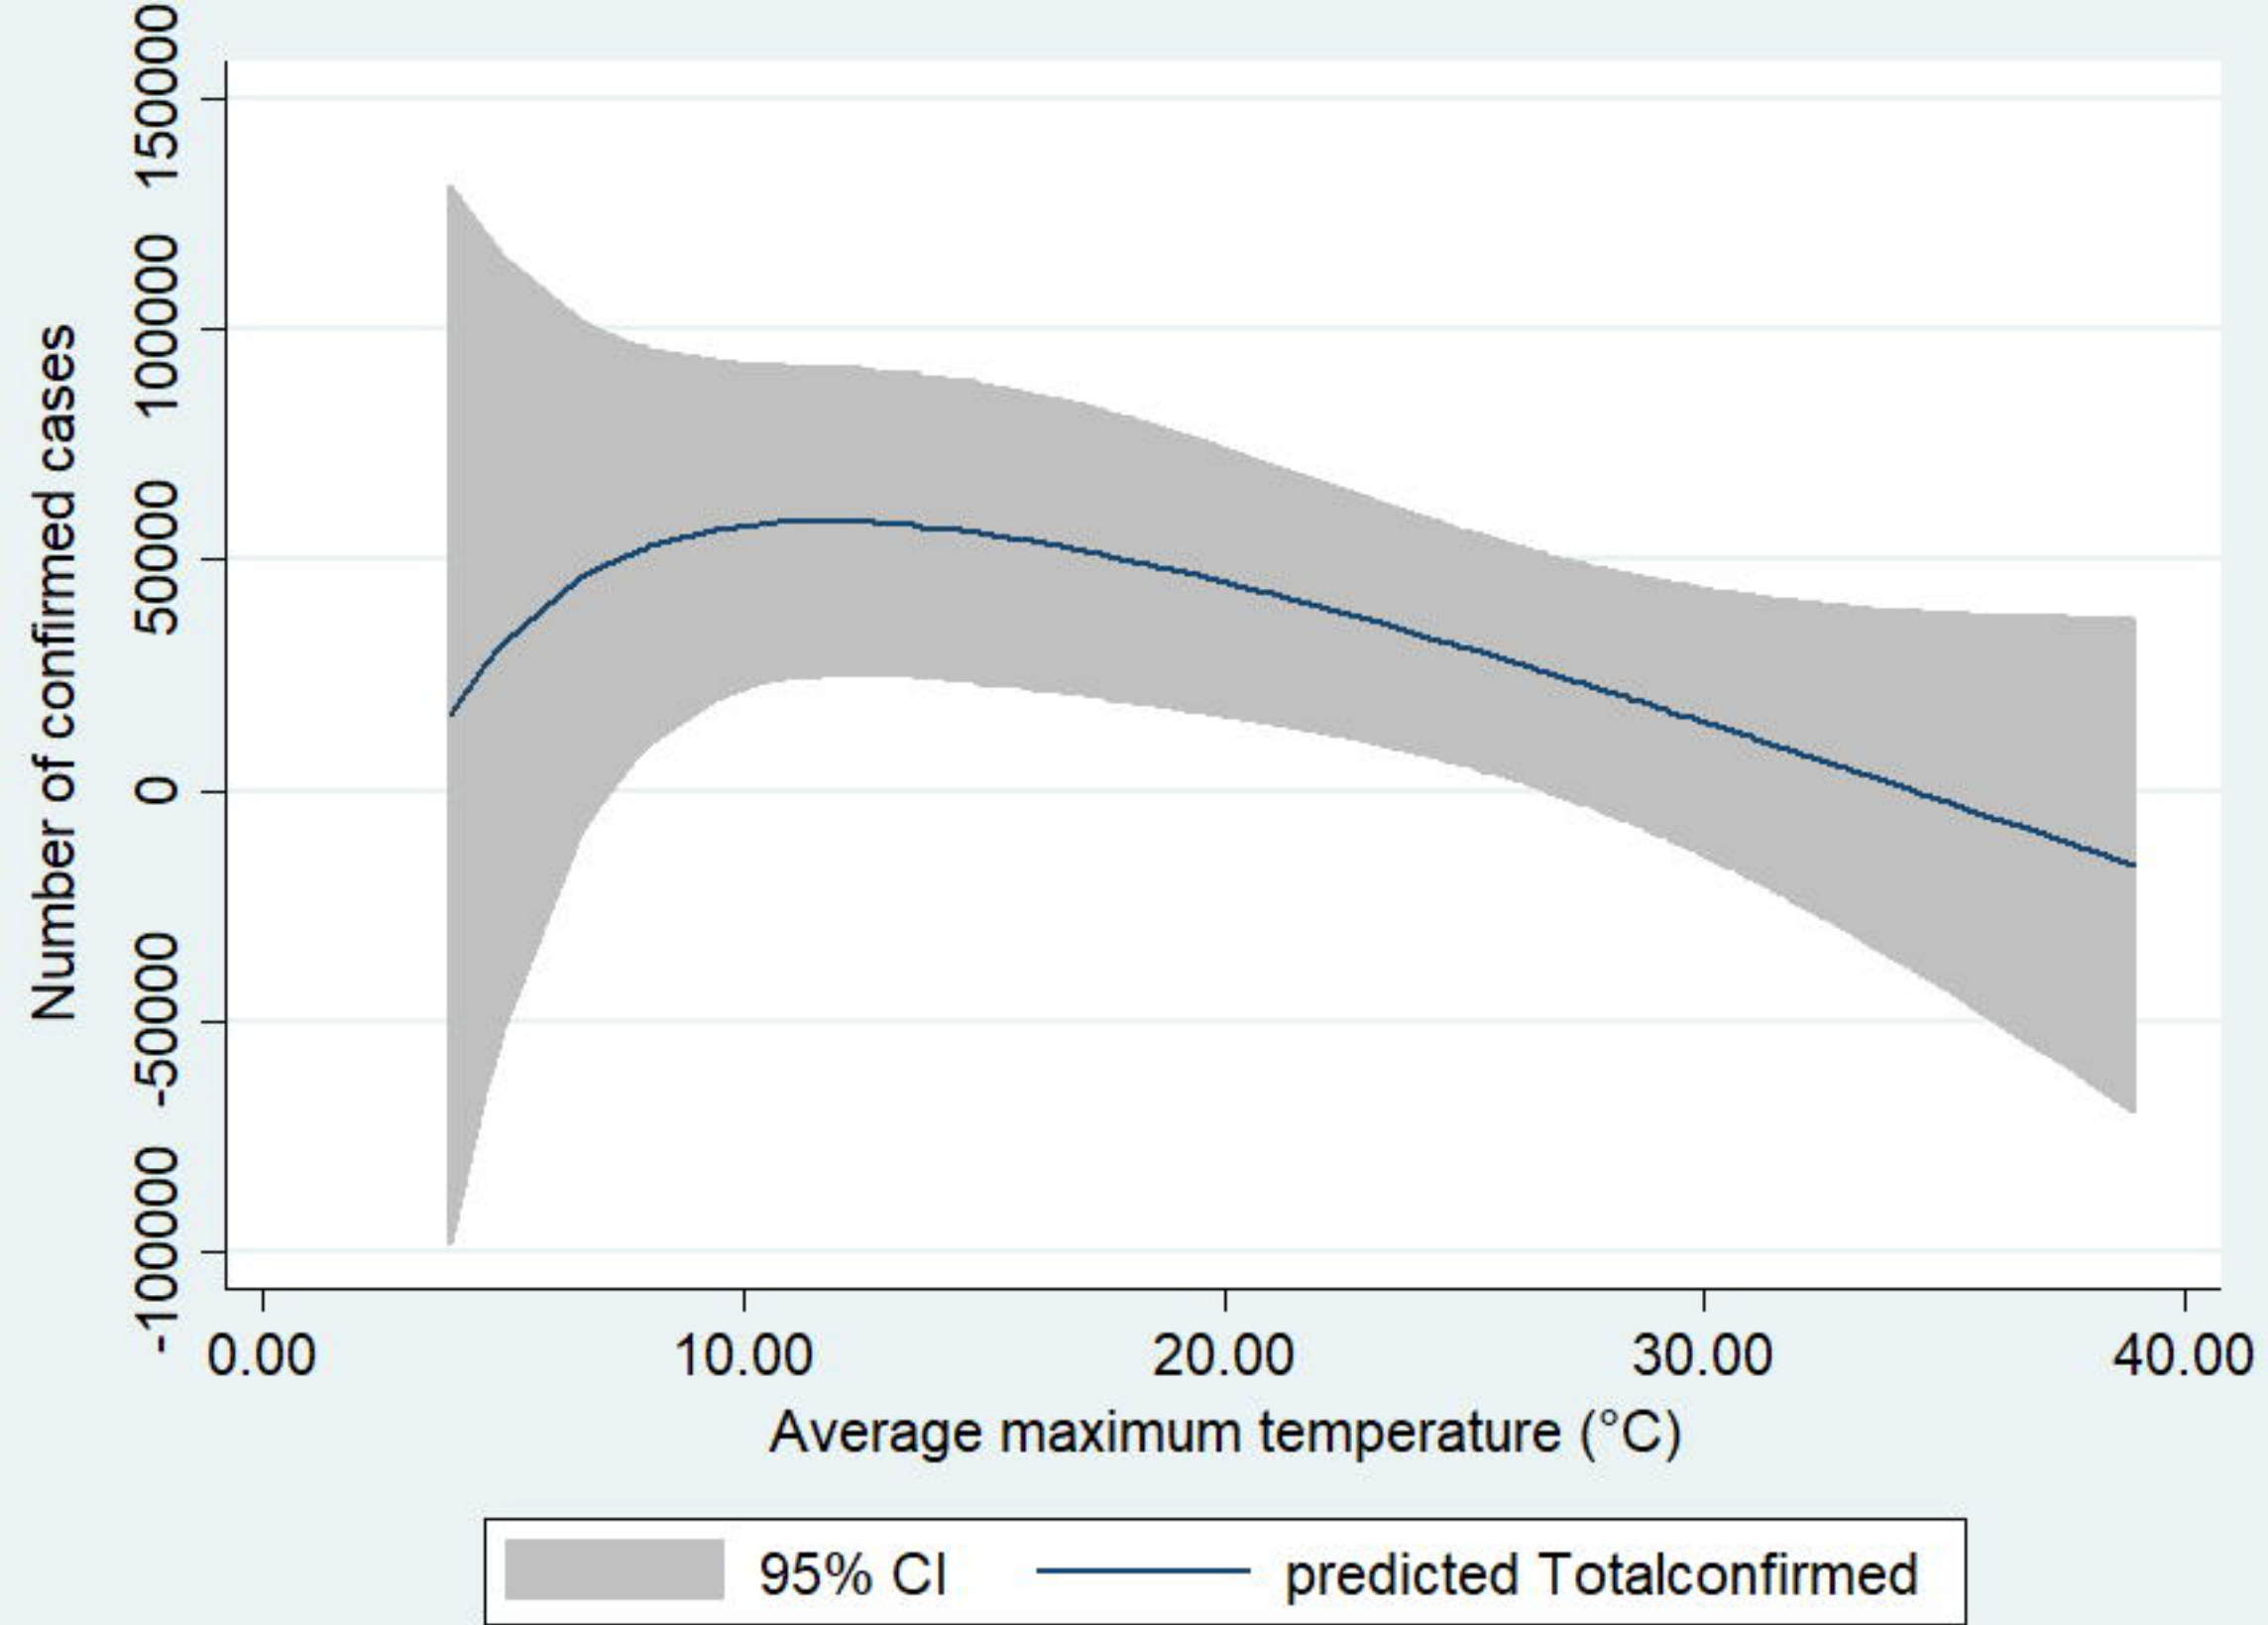

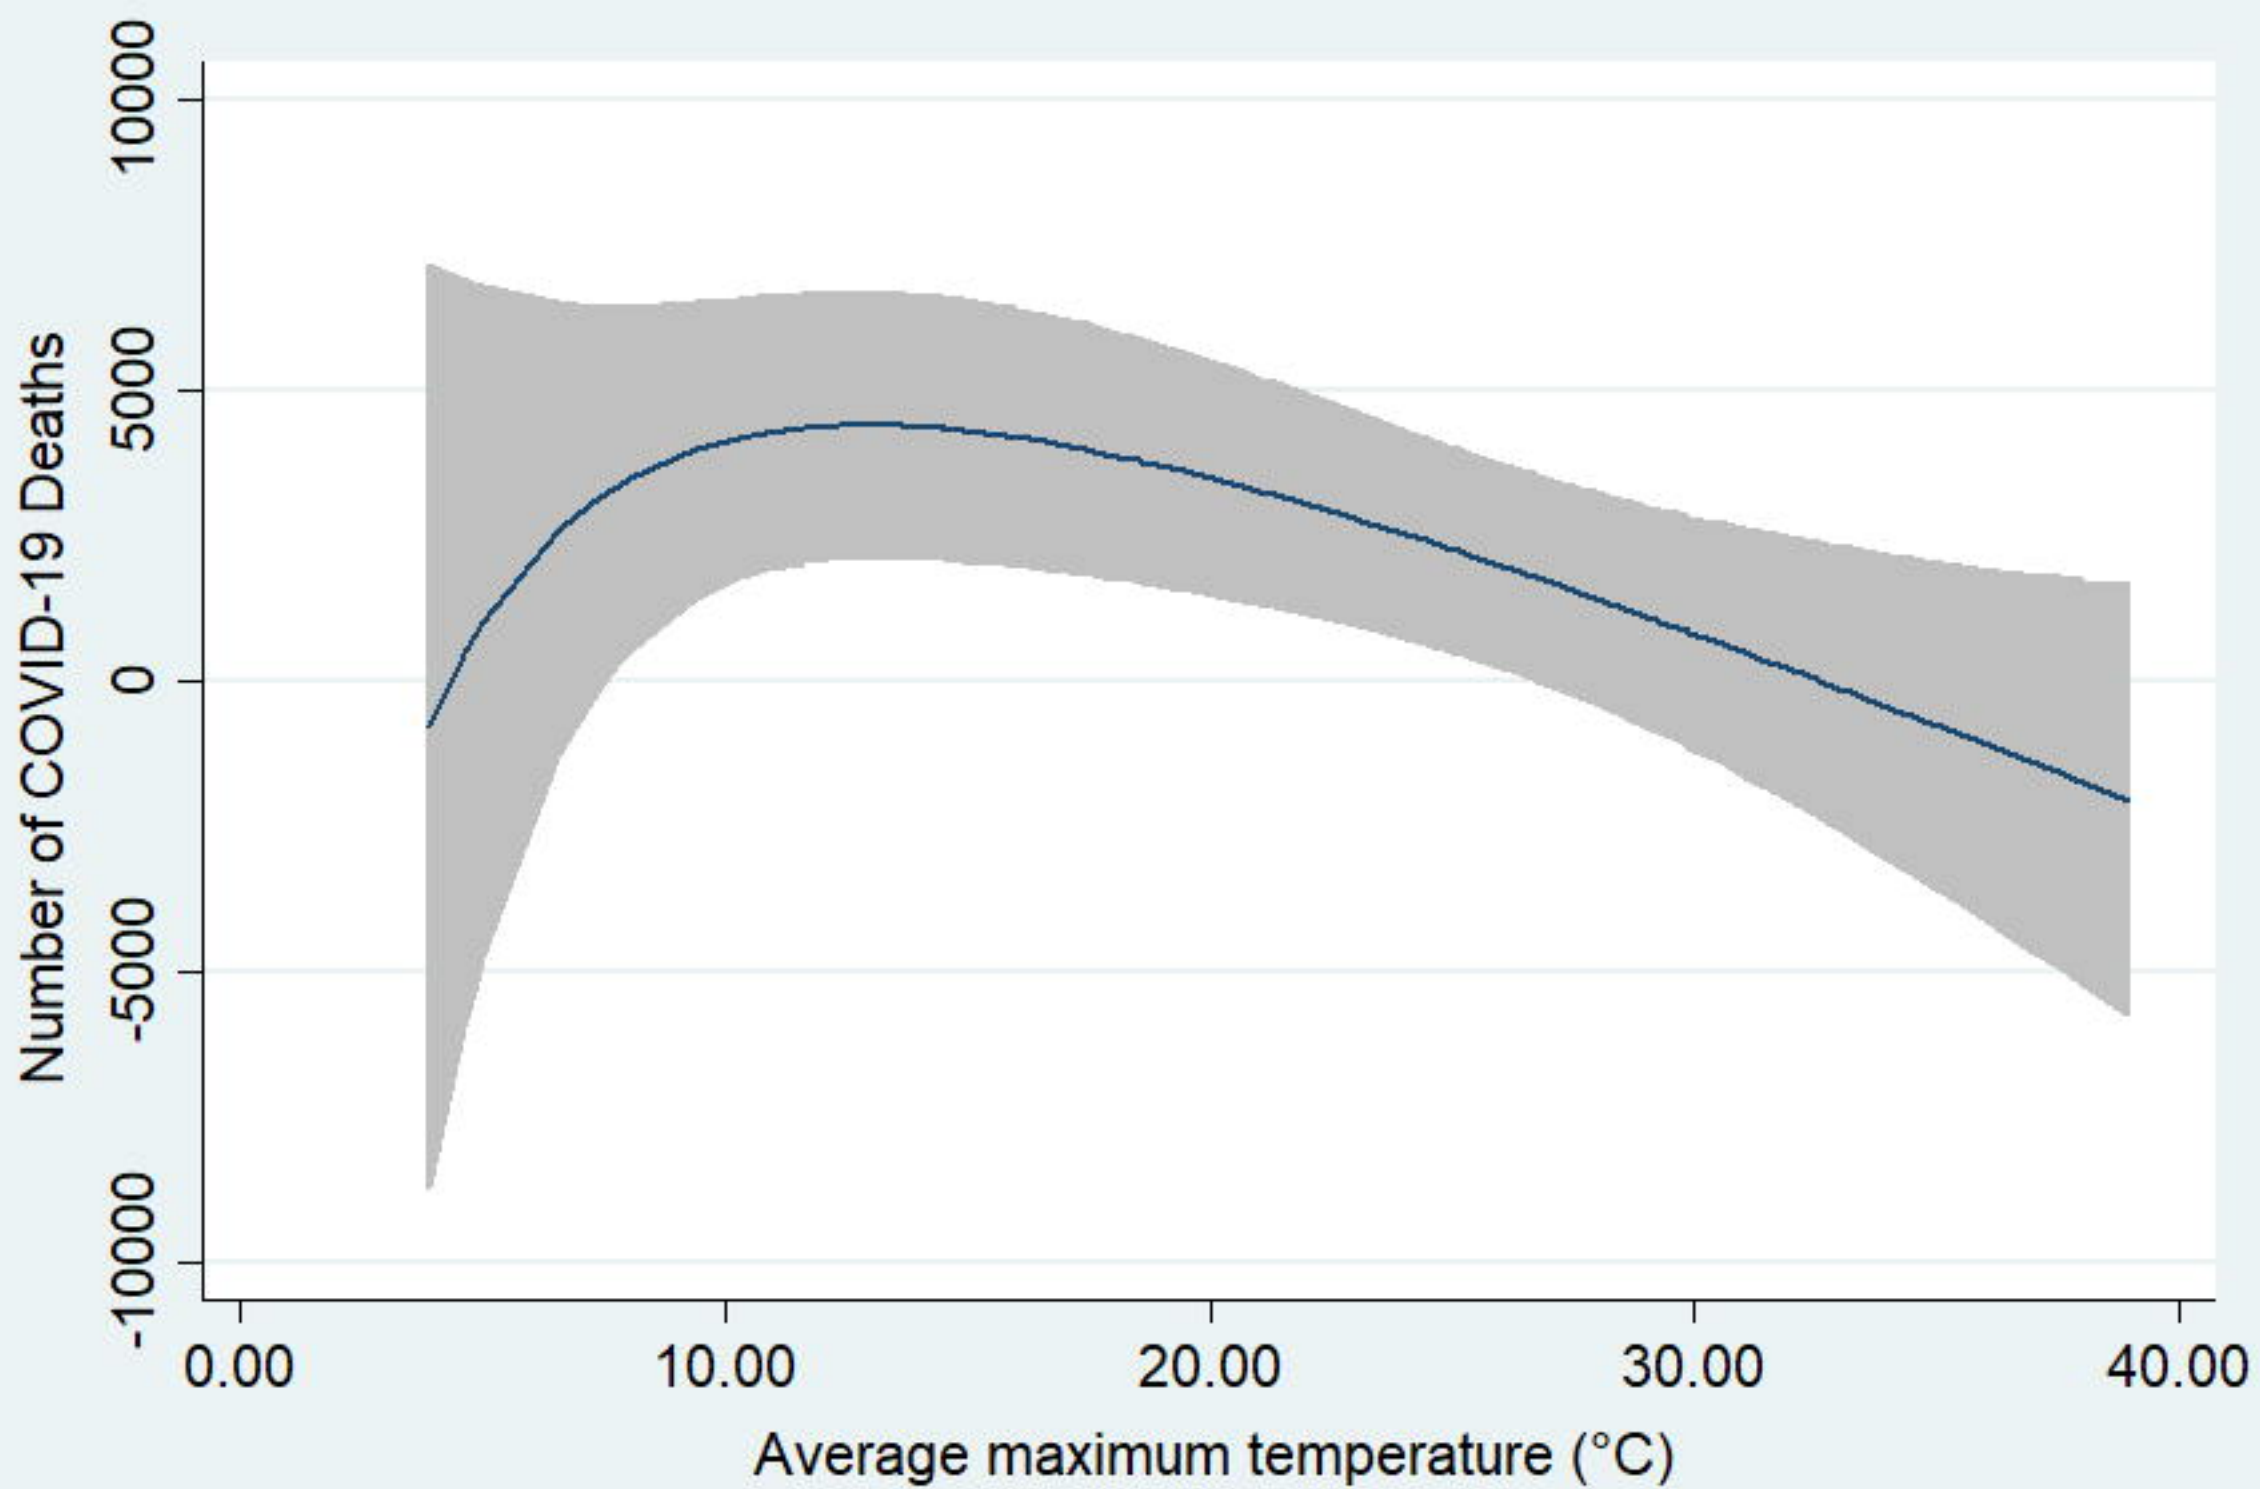

95% CI predicted TotalDeaths

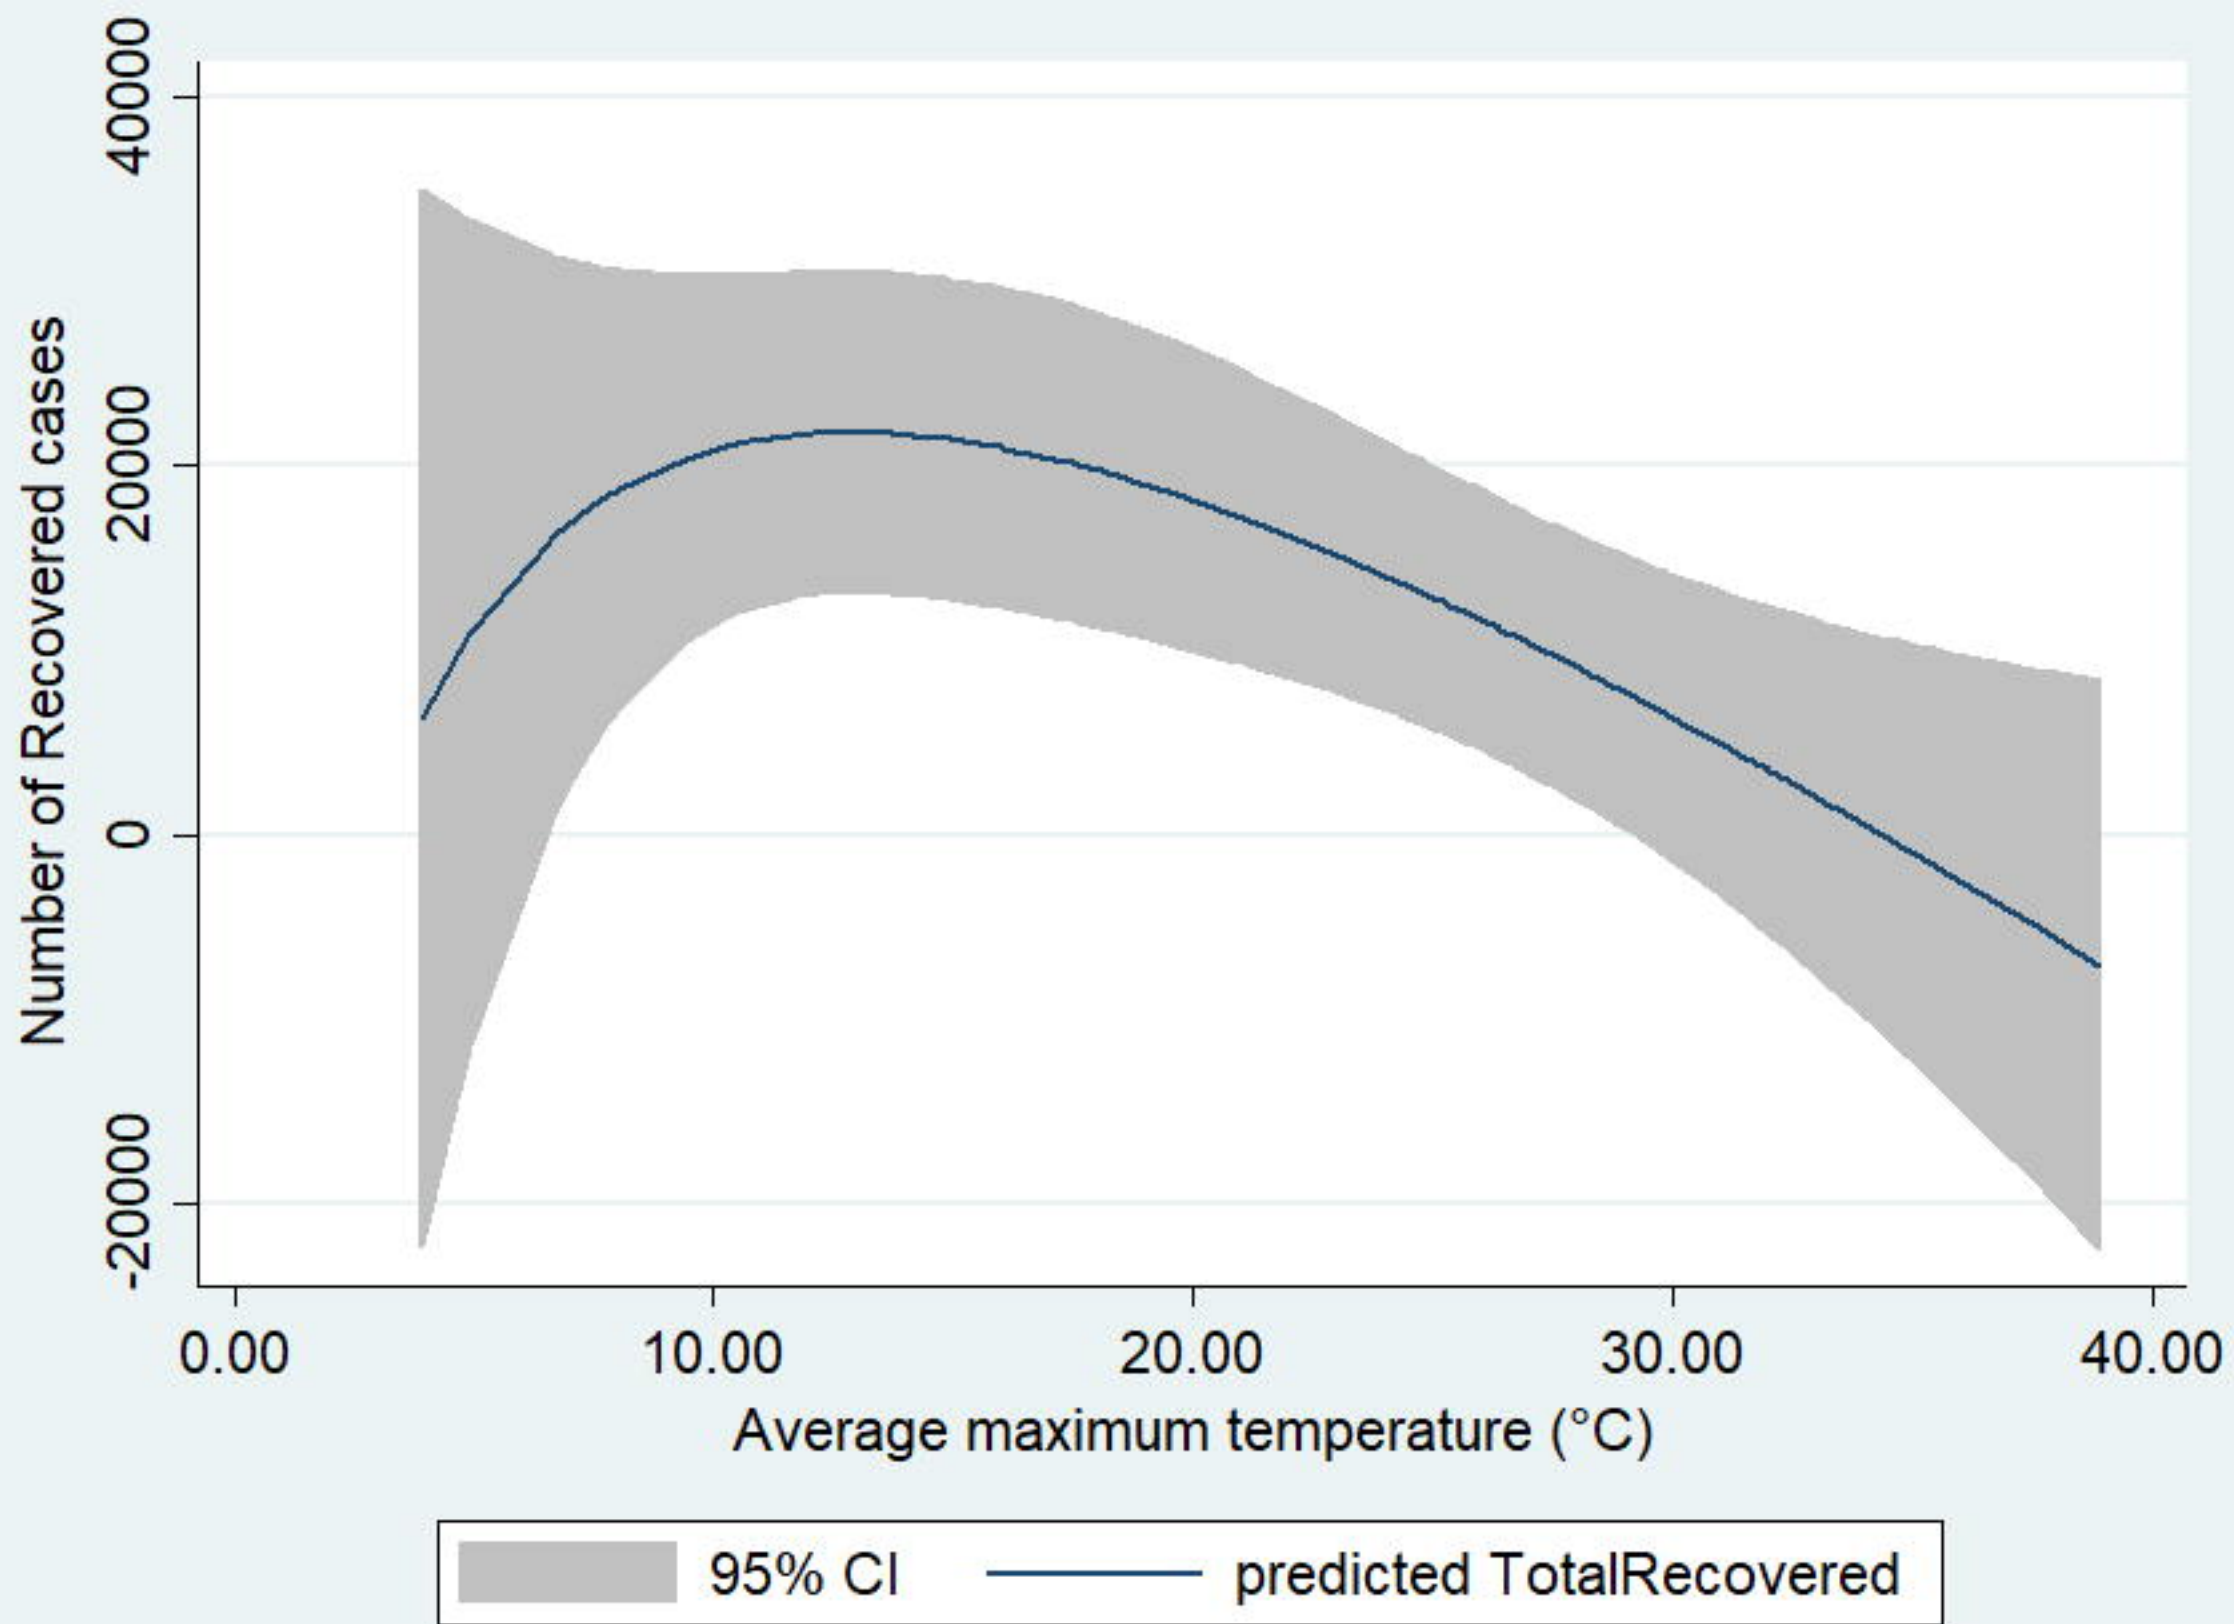

Source: https://medrxiv.org/content/medrxiv/early/2020/06/16/2020.06.13.20130138.full.pdf
